# Supplementary material for: The fecal microbiota of Thai school-aged children associated with demographic factors and diet
Source: PeerJ. 2022 Apr 20;10:e13325. doi: 10.7717/peerj.13325 (PMC9034706; doi:10.7717/peerj.13325)
Supplement: File S2 [file peerj-10-13325-s001.xlsx]

## Sheet: Demographic data
Subject_ID	Weight (Kg)	Height (cm)	Age	Age_tertile	BMI	BMI_for_age	Gender	Ethnicity	Birth_records	Feeding_type
BH202	26	139	12.03	age_C	13.46	SVThinness	Male	Akha	Caesarean section	Breastfeeding
BH321	22	119	6.11	age_A	15.54	Normal	Male	Akha	Caesarean section	Breastfeeding
BH347	23	120	6.08	age_A	15.97	Normal	Male	Chinese	Caesarean section	Breastfeeding
BH291	27	121.5	7.02	age_A	18.29	OV	Male	Chinese	Vaginal delivery	Formular feeding
BH294	19	114	6.1	age_A	14.62	Normal	Male	Chinese	Vaginal delivery	Breastfeeding
BH344	22	119	7	age_A	15.54	Normal	Male	Chinese	Vaginal delivery	Formular feeding
BH293	20	113	7.01	age_A	15.66	Normal	Female	Akha	Vaginal delivery	Breastfeeding
BH282	26	121.5	6.08	age_A	17.61	OV	Female	Chinese	Caesarean section	Mixed feeding
BH328	20	116.5	7.02	age_A	14.74	Normal	Female	Thai Yai	Caesarean section	Mixed feeding
BH295	23	121	7.01	age_A	15.71	Normal	Female	Thai Yai	Vaginal delivery	Breastfeeding
BH332	20	120	6.05	age_A	13.89	Normal	Female	Thai Yai	Caesarean section	Breastfeeding
BH288	18	113.5	7.07	age_A	13.97	Normal	Male	Thai Yai	Vaginal delivery	Breastfeeding
BH284	19	118	8.09	age_B	13.65	Normal	Female	Thai Yai	Caesarean section	Formular feeding
BH320	18	113	8.04	age_A	14.1	Normal	Male	Chinese	Vaginal delivery	Breastfeeding
BH343	27	122	7.02	age_A	18.14	OV	Male	Thai	Vaginal delivery	Breastfeeding
BH312	22	116.5	8.03	age_A	16.21	Normal	Male	Akha	Caesarean section	Formular feeding
BH298	17	111	7.03	age_A	13.8	Normal	Female	Akha	Vaginal delivery	Breastfeeding
BH337	20	117	6.08	age_A	14.61	Normal	Female	Thai Yai	Vaginal delivery	Breastfeeding
BH327	17	105.5	7.02	age_A	15.27	Normal	Female	Chinese	Caesarean section	Mixed feeding
BH290	19	121	8.1	age_B	12.98	Thinness	Female	Chinese	Vaginal delivery	Formular feeding
BH203	23	121	12	age_C	15.71	Normal	Female	Akha	Vaginal delivery	Breastfeeding
BH340	24	124	8.06	age_B	15.61	Normal	Male	Akha	Vaginal delivery	Breastfeeding
BH341	25	123	7.09	age_A	16.52	Normal	Male	Chinese	Caesarean section	Breastfeeding
BH314	39	135	8.04	age_A	21.4	OB	Male	Thai	Caesarean section	Formular feeding
BH303	50	162	14.1	age_C	19.05	Normal	Male	Lahu	Vaginal delivery	Breastfeeding
BH281	35	129	14.05	age_C	21.03	Normal	Male	Akha	Caesarean section	Breastfeeding
BH286	24	130	8.08	age_B	14.2	Normal	Male	Thai	Vaginal delivery	Formular feeding
BH307	21	120	8.04	age_A	14.58	Normal	Female	Akha	Vaginal delivery	Breastfeeding
BH316	39	137	8.03	age_A	20.78	OV	Female	Akha	Vaginal delivery	Formular feeding
BH296	45	149	13.1	age_C	20.27	Normal	Female	Lahu	Vaginal delivery	Breastfeeding
BH333	25	125	8.03	age_A	16	Normal	Female	Thai Yai	Vaginal delivery	Breastfeeding
BH317	20	124	7.09	age_A	13.01	Normal	Female	Akha	Caesarean section	Breastfeeding
BH331	29	128	7.09	age_A	17.7	OV	Female	Akha	Vaginal delivery	Breastfeeding
BH342	24	126	8.01	age_A	15.12	Normal	Female	Thai	Vaginal delivery	Breastfeeding
BH287	19	118	8.07	age_B	13.65	Normal	Female	Thai	Vaginal delivery	Breastfeeding
BH305	21	128	7.05	age_A	12.82	Normal	Female	Akha	Vaginal delivery	Formular feeding
BH301	35	126	7.1	age_A	22.05	OB	Female	Thai	Caesarean section	Formular feeding
BH308	39	141	8.09	age_B	19.62	OV	Male	Thai Yai	Vaginal delivery	Breastfeeding
BH310	31	135	8.1	age_B	17.01	Normal	Male	Thai Yai	Vaginal delivery	Breastfeeding
BH330	21	123	8.08	age_B	13.88	Normal	Male	Thai	Caesarean section	Breastfeeding
BH304	22	124	8.07	age_B	14.31	Normal	Male	Akha	Vaginal delivery	Breastfeeding
BH319	47	151	10.07	age_B	20.61	OV	Male	Chinese	Vaginal delivery	Breastfeeding
BH300	22	130	9.02	age_B	13.02	Thinness	Male	Thai	Caesarean section	Breastfeeding
BH306	30	135	9.02	age_B	16.46	Normal	Female	Akha	Vaginal delivery	Breastfeeding
BH326	33	135	9.03	age_B	18.11	Normal	Female	Thai Yai	Vaginal delivery	Breastfeeding
BH289	26	129	9.02	age_B	15.62	Normal	Female	Thai Yai	Vaginal delivery	Breastfeeding
BH285	28	134	9.1	age_B	15.59	Normal	Female	Chinese	Vaginal delivery	Formular feeding
BH346	24	121	9	age_B	16.39	Normal	Female	Chinese	Vaginal delivery	Formular feeding
BH345	26	126	8.09	age_B	16.38	Normal	Female	Chinese	Vaginal delivery	Formular feeding
BH299	29	126	8.11	age_B	18.27	Normal	Female	Akha	Vaginal delivery	Breastfeeding
BH325	36	125	8.1	age_B	23.04	OB	Female	Chinese	Caesarean section	Formular feeding
BH311	49	153	13.07	age_C	20.93	Normal	Female	Akha	Caesarean section	Breastfeeding
BH309	39	146	10.06	age_B	18.3	Normal	Female	Akha	Vaginal delivery	Formular feeding
BH238	29	129	10.04	age_B	17.43	Normal	Male	Akha	Vaginal delivery	Breastfeeding
BH240	25	126	10.11	age_B	15.75	Normal	Male	Akha	Vaginal delivery	Breastfeeding
BH271	23	127	9.06	age_B	14.26	Normal	Male	Thai Yai	Caesarean section	Formular feeding
BH221	50	145	9.06	age_B	23.78	OB	Male	Chinese	Caesarean section	Breastfeeding
BH235	31	134	9.1	age_B	17.26	Normal	Male	Thai Yai	Vaginal delivery	Breastfeeding
BH241	33	136	10.09	age_B	17.84	Normal	Male	Akha	Caesarean section	Mixed feeding
BH230	40.5	135	10.01	age_B	0.23	OB	Male	Chinese	Vaginal delivery	Breastfeeding
BH272	37	131	10.02	age_B	21.56	OV	Female	Chinese	Vaginal delivery	Breastfeeding
BH263	39	144	10.01	age_B	18.81	Normal	Female	Thai	Vaginal delivery	Breastfeeding
BH261	29	134	10	age_B	16.15	Normal	Female	Akha	Vaginal delivery	Breastfeeding
BH225	34	146	10.01	age_B	15.95	Normal	Female	Chinese	Vaginal delivery	Breastfeeding
BH256	41	138	10.01	age_B	21.53	OV	Female	Chinese	Vaginal delivery	Breastfeeding
BH217	36	138	9.08	age_B	18.9	OV	Female	Chinese	Caesarean section	Breastfeeding
BH247	54	153	11.06	age_C	23.07	OV	Female	Chinese	Caesarean section	Breastfeeding
BH215	31	143	10.03	age_B	15.16	Normal	Female	Chinese	Caesarean section	Breastfeeding
BH211	44	144	10.04	age_B	21.22	OV	Female	Chinese	Vaginal delivery	Breastfeeding
BH243	23	127	9.11	age_B	14.26	Normal	Female	Thai Yai	Vaginal delivery	Breastfeeding
BH279	49	150	10.01	age_B	21.78	OV	Female	Akha	Caesarean section	Breastfeeding
BH266	44	152	11.1	age_C	19.04	Normal	Female	Thai Yai	Vaginal delivery	Formular feeding
BH264	37	144	11.06	age_C	17.84	Normal	Male	Chinese	Vaginal delivery	Breastfeeding
BH216	35	142	10.11	age_B	17.36	Normal	Male	Akha	Vaginal delivery	Breastfeeding
BH237	42	156	11.04	age_B	17.26	Normal	Male	Thai	Caesarean section	Breastfeeding
BH259	39	148	13.01	age_C	17.8	Normal	Male	Lahu	Caesarean section	Mixed feeding
BH205	52	158	10.11	age_B	20.83	OV	Male	Thai Yai	Vaginal delivery	Breastfeeding
BH206	28	142	10.1	age_B	13.89	Thinness	Male	Thai Yai	Vaginal delivery	Breastfeeding
BH258	26	136	11.03	age_B	14.06	Thinness	Male	Thai	Vaginal delivery	Breastfeeding
BH276	35	142	10.1	age_B	17.36	Normal	Male	Thai	Caesarean section	Breastfeeding
BH248	49	153	10.08	age_B	20.93	OV	Female	Thai Yai	Caesarean section	Breastfeeding
BH228	29	138	11.01	age_B	15.23	Normal	Female	Akha	Vaginal delivery	Breastfeeding
BH207	40	150	10.11	age_B	17.78	Normal	Female	Chinese	Vaginal delivery	Breastfeeding
BH204	35	145	11.11	age_C	16.65	Normal	Female	Chinese	Vaginal delivery	Breastfeeding
BH253	30	144	10.07	age_B	14.47	Normal	Female	Akha	Caesarean section	Breastfeeding
BH270	31	141	10.05	age_B	15.59	Normal	Female	Thai Yai	Caesarean section	Breastfeeding
BH224	32	135	11	age_B	17.56	Normal	Female	Thai	Vaginal delivery	Breastfeeding
BH227	38	145	11.04	age_B	18.07	Normal	Female	Thai	Vaginal delivery	Breastfeeding
BH268	28	132	13.11	age_C	16.07	Normal	Female	Chinese	Vaginal delivery	Mixed feeding
BH265	41	151	11.03	age_B	17.98	Normal	Female	Lahu	Vaginal delivery	Breastfeeding
BH267	40	154	10.11	age_B	16.87	Normal	Female	Thai	Vaginal delivery	Breastfeeding
BH212	30	149	11.02	age_B	13.51	Thinness	Female	Thai	Caesarean section	Breastfeeding
BH244	44	153	11.04	age_B	18.8	Normal	Female	Akha	Vaginal delivery	Breastfeeding
BH214	40	140	10.06	age_B	20.41	OV	Female	Chinese	Caesarean section	Breastfeeding
BH220	100	179	15.05	age_C	31.21	OB	Male	Chinese	Caesarean section	Breastfeeding
BH210	57	150	12.02	age_C	25.33	OB	Male	Akha	Vaginal delivery	Breastfeeding
BH223	31	141	11.07	age_C	15.59	Normal	Male	Akha	Vaginal delivery	Breastfeeding
BH269	61	162	14.09	age_C	23.24	OV	Male	Akha	Vaginal delivery	Breastfeeding
BH262	85	162	13.07	age_C	32.39	OB	Male	Chinese	Vaginal delivery	Mixed feeding
BH232	42	156	13.08	age_C	17.26	Normal	Male	Thai Yai	Vaginal delivery	Breastfeeding
BH213	39	145	11.04	age_B	18.55	Normal	Male	Thai Yai	Vaginal delivery	Breastfeeding
BH234	36	146	12.03	age_C	16.89	Normal	Male	Thai Yai	Vaginal delivery	Formular feeding
BH239	45	153	15.1	age_C	19.22	Normal	Male	Akha	Vaginal delivery	Breastfeeding
BH245	43	156	14.09	age_C	17.67	Normal	Male	Chinese	Vaginal delivery	Breastfeeding
BH274	42	149	12.11	age_C	18.92	Normal	Male	Akha	Vaginal delivery	Mixed feeding
BH222	36	144	12.08	age_C	17.36	Normal	Male	Thai Yai	Vaginal delivery	Breastfeeding
BH208	48	169	13	age_C	16.81	Normal	Male	Thai Yai	Vaginal delivery	Breastfeeding
BH273	53	151	11.06	age_C	23.24	OV	Female	Akha	Caesarean section	Breastfeeding
BH249	50	154	11.11	age_C	21.08	OV	Female	Thai Yai	Caesarean section	Breastfeeding
BH255	42	157	12.07	age_C	17.04	Normal	Female	Akha	Vaginal delivery	Breastfeeding
BH229	42	149	12.09	age_C	18.92	Normal	Female	Chinese	Vaginal delivery	Breastfeeding
BH254	41	156	12.05	age_C	16.85	Normal	Female	Akha	Vaginal delivery	Mixed feeding
BH242	38	146	12.02	age_C	17.83	Normal	Female	Thai Yai	Caesarean section	Breastfeeding
BH246	42	145	12.05	age_C	19.98	Normal	Female	Thai Yai	Vaginal delivery	Breastfeeding
BH231	48	149	12.03	age_C	21.62	OV	Female	Akha	Vaginal delivery	Formular feeding
BH260	45	158	12.01	age_C	18.03	Normal	Female	Thai Yai	Vaginal delivery	Breastfeeding
BH218	42	149	11.1	age_C	18.92	Normal	Female	Akha	Vaginal delivery	Breastfeeding
BH236	65	148	10.07	age_B	29.67	OB	Female	Akha	Vaginal delivery	Breastfeeding
BH277	75	155	10.05	age_B	31.22	OB	Female	Chinese	Vaginal delivery	Breastfeeding
BH280	68	149	11.04	age_B	30.63	OB	Male	Thai	Vaginal delivery	Breastfeeding
BH302	56	146	9.11	age_B	26.27	OB	Male	Thai	Caesarean section	Breastfeeding
BH318	40	125.5	6.06	age_A	25.4	OB	Female	Akha	Vaginal delivery	Breastfeeding
BH323	67	137	7.01	age_A	35.7	OB	Female	Chinese	Caesarean section	Breastfeeding
BH334	40	130	6.11	age_A	23.67	OB	Female	Thai	Caesarean section	Breastfeeding
BH336	53	142.5	7	age_A	26.1	OB	Male	Lahu	Caesarean section	Breastfeeding
BH348	40	121.5	6.07	age_A	27.1	OB	Male	Thai Yai	Caesarean section	Formular feeding
BH349	57	142	9	age_B	28.27	OB	Male	Thai Yai	Vaginal delivery	Breastfeeding
