# Supplementary material for: The fecal microbiota of Thai school-aged children associated with demographic factors and diet
Source: PeerJ. 2022 Apr 20;10:e13325. doi: 10.7717/peerj.13325 (PMC9034706; doi:10.7717/peerj.13325)
Supplement: File S3 [file peerj-10-13325-s002.xlsx]

## Sheet: 3A_FFQ
FFQ: Southeast Asian Diet Survey
Question ID	Question Name	Choices	Score Value	Answer (✓)
thai-diet.q1	Eat 3 meals a day?	Never	0
		Frequently (Daily)	3
		Sometimes (Weekly)	2
		Infrequently (Monthly)	1
thai-diet.q2	Eat a variety of foods (5 groups)?	Never	0
		Frequently (Daily)	3
		Sometimes (Weekly)	2
		Infrequently (Monthly)	1
thai-diet.q3	Eat fresh vegetables?	Never	0
		Frequently (Daily)	3
		Sometimes (Weekly)	2
		Infrequently (Monthly)	1
thai-diet.q4	Eat cooked vegetables?	Never	0
		Frequently (Daily)	3
		Sometimes (Weekly)	2
		Infrequently (Monthly)	1
thai-diet.q5	Eat fruit?	Never	0
		Frequently (Daily)	3
		Sometimes (Weekly)	2
		Infrequently (Monthly)	1
thai-diet.q6	Eat uncooked or rare to medium cooked meat or fish?	Never	3
		Frequently (Daily)	0
		Sometimes (Weekly)	1
		Infrequently (Monthly)	2
thai-diet.q7	Eat a diet high in fat?	Never	3
		Frequently (Daily)	0
		Sometimes (Weekly)	1
		Infrequently (Monthly)	2
thai-diet.q8	Eat grilled food?	Never	0
		Frequently (Daily)	3
		Sometimes (Weekly)	2
		Infrequently (Monthly)	1
thai-diet.q9	Eat fast-food?	Never	3
		Frequently (Daily)	0
		Sometimes (Weekly)	1
		Infrequently (Monthly)	2
thai-diet.q10	Eat fried foods?	Never	3
		Frequently (Daily)	0
		Sometimes (Weekly)	1
		Infrequently (Monthly)	2
thai-diet.q11	Eat food or dessert that was cooked with coconut milk, butter, or margarine?	Never	3
		Frequently (Daily)	0
		Sometimes (Weekly)	1
		Infrequently (Monthly)	2
thai-diet.q12	Eat foods high in salt?	Never	3
		Frequently (Daily)	0
		Sometimes (Weekly)	1
		Infrequently (Monthly)	2
thai-diet.q13	Eat foods with added sugar?	Never	3
		Frequently (Daily)	0
		Sometimes (Weekly)	1
		Infrequently (Monthly)	2
thai-diet.q14	Drink at least 8 glasses (2 liters) of water a day?	Never	0
		Frequently (Daily)	3
		Sometimes (Weekly)	2
		Infrequently (Monthly)	1
thai-diet.q15	Drink 1-2 glasses of whole milk or low-fat milk?	Never	0
		Frequently (Daily)	3
		Sometimes (Weekly)	2
		Infrequently (Monthly)	1
thai-diet.q16	Drink sweetened drinks (e.g., soft drinks)?	Never	3
		Frequently (Daily)	0
		Sometimes (Weekly)	1
		Infrequently (Monthly)	2
thai-diet.q17	Drink alcoholic beverages?	Never	3
		Frequently (Daily)	0
		Sometimes (Weekly)	1
		Infrequently (Monthly)	2
thai-diet.q18	Add fish sauce/fish sauce with chilies to your meal?	Never	3
		Frequently (Daily)	0
		Sometimes (Weekly)	1
		Infrequently (Monthly)	2
thai-diet.q19	Add fish sauce to noodles?	Never	3
		Frequently (Daily)	0
		Sometimes (Weekly)	1
		Infrequently (Monthly)	2
thai-diet.q20	Add sugar to noodles?	Never	3
		Frequently (Daily)	0
		Sometimes (Weekly)	1
		Infrequently (Monthly)	2

## Sheet: 3B_FFQ Categories
Thai-diet survey for school-aged children
Survey Definition
Screen	Question ID	Dietary habit	Question Name	Question Render Type	Choices	Choice ID	Score Value
thai-diet.s1	thai-diet.q1	Healthy eating behavior	Eat 3 meals a day?	radio-group	Never	thai-diet.c1	0
					Frequently (Daily)	thai-diet.c4	3
					Sometimes (Weekly)	thai-diet.c3	2
					Infrequently (Monthly)	thai-diet.c2	1
thai-diet.s2	thai-diet.q2	Healthy eating behavior	Eat a variety of foods (5 groups)?	radio-group	Never	thai-diet.c1	0
					Frequently (Daily)	thai-diet.c4	3
					Sometimes (Weekly)	thai-diet.c3	2
					Infrequently (Monthly)	thai-diet.c2	1
thai-diet.s3	thai-diet.q3	Fruits and Vegetables	Eat fresh vegetables?	radio-group	Never	thai-diet.c1	0
					Frequently (Daily)	thai-diet.c4	3
					Sometimes (Weekly)	thai-diet.c3	2
					Infrequently (Monthly)	thai-diet.c2	1
thai-diet.s4	thai-diet.q4	Fruits and Vegetables	Eat cooked veggies?	radio-group	Never	thai-diet.c1	0
					Frequently (Daily)	thai-diet.c4	3
					Sometimes (Weekly)	thai-diet.c3	2
					Infrequently (Monthly)	thai-diet.c2	1
thai-diet.s5	thai-diet.q5	Fruits and Vegetables	Eat fruit?	radio-group	Never	thai-diet.c1	0
					Frequently (Daily)	thai-diet.c4	3
					Sometimes (Weekly)	thai-diet.c3	2
					Infrequently (Monthly)	thai-diet.c2	1
thai-diet.s6	thai-diet.q6	Healthy eating behavior	Eat uncooked/rare/medium meat/fish?	radio-group	Never	thai-diet.c5	3
					Frequently (Daily)	thai-diet.c8	0
					Sometimes (Weekly)	thai-diet.c7	1
					Infrequently (Monthly)	thai-diet.c6	2
thai-diet.s7	thai-diet.q7	High Fat Foods	Eat high fat diet?	radio-group	Never	thai-diet.c5	3
					Frequently (Daily)	thai-diet.c8	0
					Sometimes (Weekly)	thai-diet.c7	1
					Infrequently (Monthly)	thai-diet.c6	2
thai-diet.s8	thai-diet.q8	Healthy eating behavior	Eat grilled food?	radio-group	Never	thai-diet.c1	0
					Frequently (Daily)	thai-diet.c4	3
					Sometimes (Weekly)	thai-diet.c3	2
					Infrequently (Monthly)	thai-diet.c2	1
thai-diet.s9	thai-diet.q9	Healthy eating behavior	Eat fast-food?	radio-group	Never	thai-diet.c5	3
					Frequently (Daily)	thai-diet.c8	0
					Sometimes (Weekly)	thai-diet.c7	1
					Infrequently (Monthly)	thai-diet.c6	2
thai-diet.s10	thai-diet.q10	High Fat Foods	Eat fried foods?	radio-group	Never	thai-diet.c5	3
					Frequently (Daily)	thai-diet.c8	0
					Sometimes (Weekly)	thai-diet.c7	1
					Infrequently (Monthly)	thai-diet.c6	2
thai-diet.s11	thai-diet.q11	High Fat Foods	Eat food or dessert that was cooked with coconut milk, butter, or margarine?	radio-group	Never	thai-diet.c5	3
					Frequently (Daily)	thai-diet.c8	0
					Sometimes (Weekly)	thai-diet.c7	1
					Infrequently (Monthly)	thai-diet.c6	2
thai-diet.s12	thai-diet.q12	High Salt Foods	Eat salty foods?	radio-group	Never	thai-diet.c5	3
					Frequently (Daily)	thai-diet.c8	0
					Sometimes (Weekly)	thai-diet.c7	1
					Infrequently (Monthly)	thai-diet.c6	2
thai-diet.s13	thai-diet.q13	High Sugar Foods and Beverages	Eat foods with added sugar?	radio-group	Never	thai-diet.c5	3
					Frequently (Daily)	thai-diet.c8	0
					Sometimes (Weekly)	thai-diet.c7	1
					Infrequently (Monthly)	thai-diet.c6	2
thai-diet.s14	thai-diet.q14	Healthy eating behavior	Drink at least 8 glasses (2 liters) of water a day?	radio-group	Never	thai-diet.c1	0
					Frequently (Daily)	thai-diet.c4	3
					Sometimes (Weekly)	thai-diet.c3	2
					Infrequently (Monthly)	thai-diet.c2	1
thai-diet.s15	thai-diet.q15	Healthy eating behavior	Drink 1-2 glasses of whole milk or low-fat milk?	radio-group	Never	thai-diet.c1	0
					Frequently (Daily)	thai-diet.c4	3
					Sometimes (Weekly)	thai-diet.c3	2
					Infrequently (Monthly)	thai-diet.c2	1
thai-diet.s16	thai-diet.q16	High Sugar Foods and Beverages	Drink sweetened drinks e.g. soft drinks?	radio-group	Never	thai-diet.c5	3
					Frequently (Daily)	thai-diet.c8	0
					Sometimes (Weekly)	thai-diet.c7	1
					Infrequently (Monthly)	thai-diet.c6	2
thai-diet.s17	thai-diet.q17	Healthy eating behavior	Drink alcoholic beverages?	radio-group	Never	thai-diet.c5	3
					Frequently (Daily)	thai-diet.c8	0
					Sometimes (Weekly)	thai-diet.c7	1
					Infrequently (Monthly)	thai-diet.c6	2
thai-diet.s18	thai-diet.q18	High Salt Foods	Added fish sauce/fish sauce with chili?	radio-group	Never	thai-diet.c5	3
					Frequently (Daily)	thai-diet.c8	0
					Sometimes (Weekly)	thai-diet.c7	1
					Infrequently (Monthly)	thai-diet.c6	2
thai-diet.s19	thai-diet.q19	High Salt Foods	Added fish sauce in noodles?	radio-group	Never	thai-diet.c5	3
					Frequently (Daily)	thai-diet.c8	0
					Sometimes (Weekly)	thai-diet.c7	1
					Infrequently (Monthly)	thai-diet.c6	2
thai-diet.s20	thai-diet.q20	High Sugar Foods and Beverages	Added sugar to noodles?	radio-group	Never	thai-diet.c5	3
					Frequently (Daily)	thai-diet.c8	0
					Sometimes (Weekly)	thai-diet.c7	1
					Infrequently (Monthly)	thai-diet.c6	2
Feedback Categories
Description	Criteria
Healthy Eating - Low Risk	thai-diet.healthy_eating in_range 19:24
Healthy Eating - Low to Moderate Risk	thai-diet.healthy_eating in_range 13:18
Healthy Eating - Moderate to High Risk	thai-diet.healthy_eating in_range 7:12
Healthy Eating - High Risk	thai-diet.healthy_eating in_range 0:6
High Sugar Foods and Beverages - Low Risk	thai-diet.high_sugar in_range 8:9
High Sugar Foods and Beverages - Low to Moderate Risk	thai-diet.high_sugar in_range 5:7
High Sugar Foods and Beverages - Moderate to High Risk	thai-diet.high_sugar in_range 2:4
High Sugar Foods and Beverages - High Risk	thai-diet.high_sugar in_range 0:1
High Salt Foods - Low Risk	thai-diet.high_salt in_range 8:9
High Salt Foods - Low to Moderate Risk	thai-diet.high_salt in_range 5:7
High Salt Foods - Moderate to High Risk	thai-diet.high_salt in_range 2:4
High Salt Foods - High Risk	thai-diet.high_salt in_range 0:1
Fruits and Vegetables - Low Risk	thai-diet.fruit_veg in_range 8:9
Fruits and Vegetables - Low to Moderate Risk	thai-diet.fruit_veg in_range 5:7
Fruits and Vegetables - Moderate to High Risk	thai-diet.fruit_veg in_range 2:4
Fruits and Vegetables - High Risk	thai-diet.fruit_veg in_range 0:1
High Fat Foods - Low Risk	thai-diet.high_fat in_range 8:9
High Fat Foods - Low to Moderate Risk	thai-diet.high_fat in_range 5:7
High Fat Foods - Moderate to High Risk	thai-diet.high_fat in_range 2:4
High Fat Foods - High Risk	thai-diet.high_fat in_range 0:1

## Sheet: 3C_Dietary information
subject_ID	Healthy.Eating.Behaviors	High.Sugar.Foods.and.Beverages	High.Salt.Foods	Fruits.and.Vegetables	High.Fat.Foods	Healthy.Eating.Behaviors	High.Sugar.Foods.and.Beverages	High.Salt.Foods	Fruits.and.Vegetables	High.Fat.Foods
BH202	16	1	4	9	3	Low_to_Moderate_Risk	High_Risk	Moderate_to_High_Risk	Low_Risk	Moderate_to_High_Risk
BH321	15	4	8	5	3	Low_to_Moderate_Risk	Moderate_to_High_Risk	Low_Risk	Low_to_Moderate_Risk	Moderate_to_High_Risk
BH347	18	7	7	9	1	Low_to_Moderate_Risk	Low_to_Moderate_Risk	Low_to_Moderate_Risk	Low_Risk	High_Risk
BH291	13	3	2	5	3	Low_to_Moderate_Risk	Moderate_to_High_Risk	Moderate_to_High_Risk	Low_to_Moderate_Risk	Moderate_to_High_Risk
BH294	13	3	9	3	1	Low_to_Moderate_Risk	Moderate_to_High_Risk	Low_Risk	Moderate_to_High_Risk	High_Risk
BH344	21	6	6	5	2	Low_Risk	Low_to_Moderate_Risk	Low_to_Moderate_Risk	Low_to_Moderate_Risk	Moderate_to_High_Risk
BH293	16	5	7	2	3	Low_to_Moderate_Risk	Low_to_Moderate_Risk	Low_to_Moderate_Risk	Moderate_to_High_Risk	Moderate_to_High_Risk
BH282	15	7	6	4	5	Low_to_Moderate_Risk	Low_to_Moderate_Risk	Low_to_Moderate_Risk	Moderate_to_High_Risk	Low_to_Moderate_Risk
BH328	20	8	7	7	4	Low_Risk	Low_Risk	Low_to_Moderate_Risk	Low_to_Moderate_Risk	Moderate_to_High_Risk
BH295	17	7	6	6	3	Low_to_Moderate_Risk	Low_to_Moderate_Risk	Low_to_Moderate_Risk	Low_to_Moderate_Risk	Moderate_to_High_Risk
BH332	13	1	5	8	4	Low_to_Moderate_Risk	High_Risk	Low_to_Moderate_Risk	Low_Risk	Moderate_to_High_Risk
BH288	15	5	5	6	4	Low_to_Moderate_Risk	Low_to_Moderate_Risk	Low_to_Moderate_Risk	Low_to_Moderate_Risk	Moderate_to_High_Risk
BH284	19	5	7	5	5	Low_Risk	Low_to_Moderate_Risk	Low_to_Moderate_Risk	Low_to_Moderate_Risk	Low_to_Moderate_Risk
BH320	18	4	7	5	3	Low_to_Moderate_Risk	Moderate_to_High_Risk	Low_to_Moderate_Risk	Low_to_Moderate_Risk	Moderate_to_High_Risk
BH343	18	4	9	6	1	Low_to_Moderate_Risk	Moderate_to_High_Risk	Low_Risk	Low_to_Moderate_Risk	High_Risk
BH312	21	0	2	9	0	Low_Risk	High_Risk	Moderate_to_High_Risk	Low_Risk	High_Risk
BH298	20	3	2	8	2	Low_Risk	Moderate_to_High_Risk	Moderate_to_High_Risk	Low_Risk	Moderate_to_High_Risk
BH337	14	4	8	6	5	Low_to_Moderate_Risk	Moderate_to_High_Risk	Low_Risk	Low_to_Moderate_Risk	Low_to_Moderate_Risk
BH327	18	7	8	7	4	Low_to_Moderate_Risk	Low_to_Moderate_Risk	Low_Risk	Low_to_Moderate_Risk	Moderate_to_High_Risk
BH290	19	5	9	6	3	Low_Risk	Low_to_Moderate_Risk	Low_Risk	Low_to_Moderate_Risk	Moderate_to_High_Risk
BH203	21	2	5	9	7	Low_Risk	Moderate_to_High_Risk	Low_to_Moderate_Risk	Low_Risk	Low_to_Moderate_Risk
BH340	16	3	8	5	5	Low_to_Moderate_Risk	Moderate_to_High_Risk	Low_Risk	Low_to_Moderate_Risk	Low_to_Moderate_Risk
BH341	19	6	7	6	7	Low_Risk	Low_to_Moderate_Risk	Low_to_Moderate_Risk	Low_to_Moderate_Risk	Low_to_Moderate_Risk
BH314	20	6	7	7	6	Low_Risk	Low_to_Moderate_Risk	Low_to_Moderate_Risk	Low_to_Moderate_Risk	Low_to_Moderate_Risk
BH303	17	4	4	9	6	Low_to_Moderate_Risk	Moderate_to_High_Risk	Moderate_to_High_Risk	Low_Risk	Low_to_Moderate_Risk
BH281	16	5	8	4	7	Low_to_Moderate_Risk	Low_to_Moderate_Risk	Low_Risk	Moderate_to_High_Risk	Low_to_Moderate_Risk
BH286	18	5	6	9	3	Low_to_Moderate_Risk	Low_to_Moderate_Risk	Low_to_Moderate_Risk	Low_Risk	Moderate_to_High_Risk
BH307	9	9	5	4	5	Moderate_to_High_Risk	Low_Risk	Low_to_Moderate_Risk	Moderate_to_High_Risk	Low_to_Moderate_Risk
BH316	17	5	5	5	4	Low_to_Moderate_Risk	Low_to_Moderate_Risk	Low_to_Moderate_Risk	Low_to_Moderate_Risk	Moderate_to_High_Risk
BH296	19	1	7	6	2	Low_Risk	High_Risk	Low_to_Moderate_Risk	Low_to_Moderate_Risk	Moderate_to_High_Risk
BH333	19	9	9	6	5	Low_Risk	Low_Risk	Low_Risk	Low_to_Moderate_Risk	Low_to_Moderate_Risk
BH317	23	5	5	6	1	Low_Risk	Low_to_Moderate_Risk	Low_to_Moderate_Risk	Low_to_Moderate_Risk	High_Risk
BH331	19	4	7	5	4	Low_Risk	Moderate_to_High_Risk	Low_to_Moderate_Risk	Low_to_Moderate_Risk	Moderate_to_High_Risk
BH342	19	0	6	6	3	Low_Risk	High_Risk	Low_to_Moderate_Risk	Low_to_Moderate_Risk	Moderate_to_High_Risk
BH287	18	7	7	6	2	Low_to_Moderate_Risk	Low_to_Moderate_Risk	Low_to_Moderate_Risk	Low_to_Moderate_Risk	Moderate_to_High_Risk
BH305	14	3	5	5	2	Low_to_Moderate_Risk	Moderate_to_High_Risk	Low_to_Moderate_Risk	Low_to_Moderate_Risk	Moderate_to_High_Risk
BH301	18	5	6	7	3	Low_to_Moderate_Risk	Low_to_Moderate_Risk	Low_to_Moderate_Risk	Low_to_Moderate_Risk	Moderate_to_High_Risk
BH308	18	3	3	7	4	Low_to_Moderate_Risk	Moderate_to_High_Risk	Moderate_to_High_Risk	Low_to_Moderate_Risk	Moderate_to_High_Risk
BH310	24	0	6	6	3	Low_Risk	High_Risk	Low_to_Moderate_Risk	Low_to_Moderate_Risk	Moderate_to_High_Risk
BH330	21	1	5	9	1	Low_Risk	High_Risk	Low_to_Moderate_Risk	Low_Risk	High_Risk
BH304	12	3	9	9	9	Moderate_to_High_Risk	Moderate_to_High_Risk	Low_Risk	Low_Risk	Low_Risk
BH319	20	3	5	8	6	Low_Risk	Moderate_to_High_Risk	Low_to_Moderate_Risk	Low_Risk	Low_to_Moderate_Risk
BH300	15	0	0	0	2	Low_to_Moderate_Risk	High_Risk	High_Risk	High_Risk	Moderate_to_High_Risk
BH306	19	5	5	4	5	Low_Risk	Low_to_Moderate_Risk	Low_to_Moderate_Risk	Moderate_to_High_Risk	Low_to_Moderate_Risk
BH326	19	6	6	8	1	Low_Risk	Low_to_Moderate_Risk	Low_to_Moderate_Risk	Low_Risk	High_Risk
BH289	15	8	9	3	8	Low_to_Moderate_Risk	Low_Risk	Low_Risk	Moderate_to_High_Risk	Low_Risk
BH285	10	1	5	4	4	Moderate_to_High_Risk	High_Risk	Low_to_Moderate_Risk	Moderate_to_High_Risk	Moderate_to_High_Risk
BH346	14	6	4	6	5	Low_to_Moderate_Risk	Low_to_Moderate_Risk	Moderate_to_High_Risk	Low_to_Moderate_Risk	Low_to_Moderate_Risk
BH345	16	5	7	3	6	Low_to_Moderate_Risk	Low_to_Moderate_Risk	Low_to_Moderate_Risk	Moderate_to_High_Risk	Low_to_Moderate_Risk
BH299	14	6	6	7	4	Low_to_Moderate_Risk	Low_to_Moderate_Risk	Low_to_Moderate_Risk	Low_to_Moderate_Risk	Moderate_to_High_Risk
BH325	15	5	8	8	4	Low_to_Moderate_Risk	Low_to_Moderate_Risk	Low_Risk	Low_Risk	Moderate_to_High_Risk
BH311	13	6	8	6	6	Low_to_Moderate_Risk	Low_to_Moderate_Risk	Low_Risk	Low_to_Moderate_Risk	Low_to_Moderate_Risk
BH309	12	3	7	6	5	Moderate_to_High_Risk	Moderate_to_High_Risk	Low_to_Moderate_Risk	Low_to_Moderate_Risk	Low_to_Moderate_Risk
BH238	18	2	3	7	2	Low_to_Moderate_Risk	Moderate_to_High_Risk	Moderate_to_High_Risk	Low_to_Moderate_Risk	Moderate_to_High_Risk
BH240	13	3	4	9	3	Low_to_Moderate_Risk	Moderate_to_High_Risk	Moderate_to_High_Risk	Low_Risk	Moderate_to_High_Risk
BH271	15	6	8	7	7	Low_to_Moderate_Risk	Low_to_Moderate_Risk	Low_Risk	Low_to_Moderate_Risk	Low_to_Moderate_Risk
BH221	18	6	7	7	2	Low_to_Moderate_Risk	Low_to_Moderate_Risk	Low_to_Moderate_Risk	Low_to_Moderate_Risk	Moderate_to_High_Risk
BH235	17	4	9	7	5	Low_to_Moderate_Risk	Moderate_to_High_Risk	Low_Risk	Low_to_Moderate_Risk	Low_to_Moderate_Risk
BH241	13	0	8	6	8	Low_to_Moderate_Risk	High_Risk	Low_Risk	Low_to_Moderate_Risk	Low_Risk
BH230	14	3	4	6	4	Low_to_Moderate_Risk	Moderate_to_High_Risk	Moderate_to_High_Risk	Low_to_Moderate_Risk	Moderate_to_High_Risk
BH272	19	3	5	7	3	Low_Risk	Moderate_to_High_Risk	Low_to_Moderate_Risk	Low_to_Moderate_Risk	Moderate_to_High_Risk
BH263	21	7	9	6	6	Low_Risk	Low_to_Moderate_Risk	Low_Risk	Low_to_Moderate_Risk	Low_to_Moderate_Risk
BH261	12	5	8	5	5	Moderate_to_High_Risk	Low_to_Moderate_Risk	Low_Risk	Low_to_Moderate_Risk	Low_to_Moderate_Risk
BH225	18	2	6	7	1	Low_to_Moderate_Risk	Moderate_to_High_Risk	Low_to_Moderate_Risk	Low_to_Moderate_Risk	High_Risk
BH256	16	5	6	5	4	Low_to_Moderate_Risk	Low_to_Moderate_Risk	Low_to_Moderate_Risk	Low_to_Moderate_Risk	Moderate_to_High_Risk
BH217	11	0	7	7	8	Moderate_to_High_Risk	High_Risk	Low_to_Moderate_Risk	Low_to_Moderate_Risk	Low_Risk
BH247	18	4	5	6	3	Low_to_Moderate_Risk	Moderate_to_High_Risk	Low_to_Moderate_Risk	Low_to_Moderate_Risk	Moderate_to_High_Risk
BH215	19	7	9	6	4	Low_Risk	Low_to_Moderate_Risk	Low_Risk	Low_to_Moderate_Risk	Moderate_to_High_Risk
BH211	17	5	8	6	3	Low_to_Moderate_Risk	Low_to_Moderate_Risk	Low_Risk	Low_to_Moderate_Risk	Moderate_to_High_Risk
BH243	17	5	6	9	1	Low_to_Moderate_Risk	Low_to_Moderate_Risk	Low_to_Moderate_Risk	Low_Risk	High_Risk
BH279	20	8	6	7	4	Low_Risk	Low_Risk	Low_to_Moderate_Risk	Low_to_Moderate_Risk	Moderate_to_High_Risk
BH266	12	3	6	6	6	Moderate_to_High_Risk	Moderate_to_High_Risk	Low_to_Moderate_Risk	Low_to_Moderate_Risk	Low_to_Moderate_Risk
BH264	19	5	9	9	5	Low_Risk	Low_to_Moderate_Risk	Low_Risk	Low_Risk	Low_to_Moderate_Risk
BH216	14	3	3	6	5	Low_to_Moderate_Risk	Moderate_to_High_Risk	Moderate_to_High_Risk	Low_to_Moderate_Risk	Low_to_Moderate_Risk
BH237	15	7	5	5	4	Low_to_Moderate_Risk	Low_to_Moderate_Risk	Low_to_Moderate_Risk	Low_to_Moderate_Risk	Moderate_to_High_Risk
BH259	15	3	4	7	4	Low_to_Moderate_Risk	Moderate_to_High_Risk	Moderate_to_High_Risk	Low_to_Moderate_Risk	Moderate_to_High_Risk
BH205	16	4	4	7	5	Low_to_Moderate_Risk	Moderate_to_High_Risk	Moderate_to_High_Risk	Low_to_Moderate_Risk	Low_to_Moderate_Risk
BH206	19	5	4	7	6	Low_Risk	Low_to_Moderate_Risk	Moderate_to_High_Risk	Low_to_Moderate_Risk	Low_to_Moderate_Risk
BH258	16	4	4	3	5	Low_to_Moderate_Risk	Moderate_to_High_Risk	Moderate_to_High_Risk	Moderate_to_High_Risk	Low_to_Moderate_Risk
BH276	20	7	9	6	3	Low_Risk	Low_to_Moderate_Risk	Low_Risk	Low_to_Moderate_Risk	Moderate_to_High_Risk
BH248	20	1	7	8	4	Low_Risk	High_Risk	Low_to_Moderate_Risk	Low_Risk	Moderate_to_High_Risk
BH228	14	1	6	8	2	Low_to_Moderate_Risk	High_Risk	Low_to_Moderate_Risk	Low_Risk	Moderate_to_High_Risk
BH207	18	5	5	7	2	Low_to_Moderate_Risk	Low_to_Moderate_Risk	Low_to_Moderate_Risk	Low_to_Moderate_Risk	Moderate_to_High_Risk
BH204	11	2	7	8	6	Moderate_to_High_Risk	Moderate_to_High_Risk	Low_to_Moderate_Risk	Low_Risk	Low_to_Moderate_Risk
BH253	18	4	5	7	3	Low_to_Moderate_Risk	Moderate_to_High_Risk	Low_to_Moderate_Risk	Low_to_Moderate_Risk	Moderate_to_High_Risk
BH270	9	5	7	4	7	Moderate_to_High_Risk	Low_to_Moderate_Risk	Low_to_Moderate_Risk	Moderate_to_High_Risk	Low_to_Moderate_Risk
BH224	18	4	5	8	3	Low_to_Moderate_Risk	Moderate_to_High_Risk	Low_to_Moderate_Risk	Low_Risk	Moderate_to_High_Risk
BH227	20	3	6	6	4	Low_Risk	Moderate_to_High_Risk	Low_to_Moderate_Risk	Low_to_Moderate_Risk	Moderate_to_High_Risk
BH268	20	3	8	8	1	Low_Risk	Moderate_to_High_Risk	Low_Risk	Low_Risk	High_Risk
BH265	20	5	8	8	4	Low_Risk	Low_to_Moderate_Risk	Low_Risk	Low_Risk	Moderate_to_High_Risk
BH267	16	2	3	8	5	Low_to_Moderate_Risk	Moderate_to_High_Risk	Moderate_to_High_Risk	Low_Risk	Low_to_Moderate_Risk
BH212	19	3	7	7	5	Low_Risk	Moderate_to_High_Risk	Low_to_Moderate_Risk	Low_to_Moderate_Risk	Low_to_Moderate_Risk
BH244	19	4	4	7	3	Low_Risk	Moderate_to_High_Risk	Moderate_to_High_Risk	Low_to_Moderate_Risk	Moderate_to_High_Risk
BH214	18	6	8	7	7	Low_to_Moderate_Risk	Low_to_Moderate_Risk	Low_Risk	Low_to_Moderate_Risk	Low_to_Moderate_Risk
BH220	18	2	2	9	4	Low_to_Moderate_Risk	Moderate_to_High_Risk	Moderate_to_High_Risk	Low_Risk	Moderate_to_High_Risk
BH210	18	2	6	5	3	Low_to_Moderate_Risk	Moderate_to_High_Risk	Low_to_Moderate_Risk	Low_to_Moderate_Risk	Moderate_to_High_Risk
BH223	21	5	6	7	5	Low_Risk	Low_to_Moderate_Risk	Low_to_Moderate_Risk	Low_to_Moderate_Risk	Low_to_Moderate_Risk
BH269	21	2	2	9	1	Low_Risk	Moderate_to_High_Risk	Moderate_to_High_Risk	Low_Risk	High_Risk
BH262	15	3	3	6	3	Low_to_Moderate_Risk	Moderate_to_High_Risk	Moderate_to_High_Risk	Low_to_Moderate_Risk	Moderate_to_High_Risk
BH232	19	3	6	7	6	Low_Risk	Moderate_to_High_Risk	Low_to_Moderate_Risk	Low_to_Moderate_Risk	Low_to_Moderate_Risk
BH213	18	1	6	6	4	Low_to_Moderate_Risk	High_Risk	Low_to_Moderate_Risk	Low_to_Moderate_Risk	Moderate_to_High_Risk
BH234	19	7	8	5	5	Low_Risk	Low_to_Moderate_Risk	Low_Risk	Low_to_Moderate_Risk	Low_to_Moderate_Risk
BH239	20	3	6	6	5	Low_Risk	Moderate_to_High_Risk	Low_to_Moderate_Risk	Low_to_Moderate_Risk	Low_to_Moderate_Risk
BH245	23	4	7	4	4	Low_Risk	Moderate_to_High_Risk	Low_to_Moderate_Risk	Moderate_to_High_Risk	Moderate_to_High_Risk
BH274	18	3	5	8	5	Low_to_Moderate_Risk	Moderate_to_High_Risk	Low_to_Moderate_Risk	Low_Risk	Low_to_Moderate_Risk
BH222	18	3	3	8	1	Low_to_Moderate_Risk	Moderate_to_High_Risk	Moderate_to_High_Risk	Low_Risk	High_Risk
BH208	21	6	3	6	2	Low_Risk	Low_to_Moderate_Risk	Moderate_to_High_Risk	Low_to_Moderate_Risk	Moderate_to_High_Risk
BH273	15	3	4	7	3	Low_to_Moderate_Risk	Moderate_to_High_Risk	Moderate_to_High_Risk	Low_to_Moderate_Risk	Moderate_to_High_Risk
BH249	20	7	0	6	5	Low_Risk	Low_to_Moderate_Risk	High_Risk	Low_to_Moderate_Risk	Low_to_Moderate_Risk
BH255	18	0	3	7	1	Low_to_Moderate_Risk	High_Risk	Moderate_to_High_Risk	Low_to_Moderate_Risk	High_Risk
BH229	15	7	7	7	6	Low_to_Moderate_Risk	Low_to_Moderate_Risk	Low_to_Moderate_Risk	Low_to_Moderate_Risk	Low_to_Moderate_Risk
BH254	15	5	6	4	6	Low_to_Moderate_Risk	Low_to_Moderate_Risk	Low_to_Moderate_Risk	Moderate_to_High_Risk	Low_to_Moderate_Risk
BH242	19	4	8	9	4	Low_Risk	Moderate_to_High_Risk	Low_Risk	Low_Risk	Moderate_to_High_Risk
BH246	17	4	3	7	3	Low_to_Moderate_Risk	Moderate_to_High_Risk	Moderate_to_High_Risk	Low_to_Moderate_Risk	Moderate_to_High_Risk
BH231	16	3	5	7	2	Low_to_Moderate_Risk	Moderate_to_High_Risk	Low_to_Moderate_Risk	Low_to_Moderate_Risk	Moderate_to_High_Risk
BH260	17	1	5	9	6	Low_to_Moderate_Risk	High_Risk	Low_to_Moderate_Risk	Low_Risk	Low_to_Moderate_Risk
BH218	18	4	5	7	4	Low_to_Moderate_Risk	Moderate_to_High_Risk	Low_to_Moderate_Risk	Low_to_Moderate_Risk	Moderate_to_High_Risk
BH236	19	3	7	7	3	Low_Risk	Moderate_to_High_Risk	Low_to_Moderate_Risk	Low_to_Moderate_Risk	Moderate_to_High_Risk
BH277	17	2	7	9	1	Low_to_Moderate_Risk	Moderate_to_High_Risk	Low_to_Moderate_Risk	Low_Risk	High_Risk
BH280	16	2	2	7	2	Low_to_Moderate_Risk	Moderate_to_High_Risk	Moderate_to_High_Risk	Low_to_Moderate_Risk	Moderate_to_High_Risk
BH302	15	3	3	6	5	Low_to_Moderate_Risk	Moderate_to_High_Risk	Moderate_to_High_Risk	Low_to_Moderate_Risk	Low_to_Moderate_Risk
BH318	16	4	7	8	3	Low_to_Moderate_Risk	Moderate_to_High_Risk	Low_to_Moderate_Risk	Low_Risk	Moderate_to_High_Risk
BH323	16	1	4	7	2	Low_to_Moderate_Risk	High_Risk	Moderate_to_High_Risk	Low_to_Moderate_Risk	Moderate_to_High_Risk
BH334	18	7	9	5	5	Low_to_Moderate_Risk	Low_to_Moderate_Risk	Low_Risk	Low_to_Moderate_Risk	Low_to_Moderate_Risk
BH336	15	2	5	9	3	Low_to_Moderate_Risk	Moderate_to_High_Risk	Low_to_Moderate_Risk	Low_Risk	Moderate_to_High_Risk
BH348	17	3	5	5	3	Low_to_Moderate_Risk	Moderate_to_High_Risk	Low_to_Moderate_Risk	Low_to_Moderate_Risk	Moderate_to_High_Risk
BH349	18	0	6	9	0	Low_to_Moderate_Risk	High_Risk	Low_to_Moderate_Risk	Low_Risk	High_Risk
