# Supplementary material for: The fecal microbiota of Thai school-aged children associated with demographic factors and diet
Source: PeerJ. 2022 Apr 20;10:e13325. doi: 10.7717/peerj.13325 (PMC9034706; doi:10.7717/peerj.13325)
Supplement: File S4 [file peerj-10-13325-s003.xlsx]

## Sheet: log10 copy numbers
subject	Total_bacteria	Firmicutes	Bacteroidetes	Gamma_proteobacteria	Prevotella	Roseburia	Ruminococcus	Faecalibacterium	Bacteroides	Akkermansia	Bifidobacterium	Lactobacillus
BH202	10.1707	7.56604	9.76917	6.95627	11.4112	8.99187	9.16788	9.40751	11.0493	7.34175	10.499	6.53383
BH321	9.81757	6.71285	9.3674	5.89116	10.9302	8.5893	8.30622	9.25912	10.6389	7.84635	8.36928	7.90315
BH347	11.7148	8.68692	11.3836	7.78744	12.3064	9.93909	10.3927	10.0356	12.4181	9.74541	12.3488	7.84164
BH291	10.8266	8.31299	9.73879	7.8141	12.2034	9.89054	9.29707	9.14199	11.6881	6.05088	7.56613	9.79665
BH294	11.1599	7.85647	10.898	8.11462	12.4995	9.68385	9.1107	9.44429	12.0568	8.33508	9.37848	7.57186
BH344	10.9686	9.27705	9.6189	7.5987	11.9984	9.73576	10.077	9.64747	11.5755	5.27062	8.30785	8.03583
BH293	9.42149	7.21854	9.28846	5.27474	9.84087	8.46113	7.85851	8.06369	10.0643	7.39185	8.53915	7.30627
BH282	9.71076	7.6275	9.80297	5.80357	9.54247	8.93424	9.10611	8.2306	10.3984	8.03395	8.98245	7.64663
BH328	9.71771	7.74686	8.80708	6.48676	11.1854	8.21327	9.09409	8.42849	10.7885	3.29702	8.16069	5.85898
BH295	10.44	8.47541	9.90197	6.72731	9.5318	9.46315	9.33564	8.85134	10.9178	6.9667	8.56132	7.55474
BH332	11.0673	9.24815	10.3667	7.75992	12.2578	9.92352	10.3644	9.3461	11.873	7.37488	10.3938	8.30528
BH288	9.71373	7.16466	9.04254	6.60844	11.0455	8.72391	8.32404	8.35443	10.6751	12.9052	8.08827	6.72923
BH284	10.553	7.24964	10.0745	7.69255	11.9059	8.3395	9.81197	8.73142	11.4884	8.76131	8.08577	6.22895
BH320	9.48026	6.73145	9.71849	5.19826	9.74214	8.46855	9.48806	8.4276	10.3848	8.27743	8.59326	6.3697
BH343	9.58424	8.01229	9.18879	6.14651	10.8376	8.58278	8.86482	8.82869	10.5387	3.43186	9.10596	6.37495
BH312	10.1335	7.4956	9.46214	7.12546	11.7175	9.60668	9.17766	9.28945	11.14	7.81313	9.62712	7.46662
BH298	10.9671	8.42603	10.1018	7.89158	11.6091	9.37154	9.25502	9.66211	11.8557	4.66496	9.37005	8.15454
BH337	9.48632	7.50371	9.28979	5.87317	10.5997	8.79743	9.09182	7.77	10.4845	8.26662	8.50109	5.35942
BH327	9.95684	9.55828	10.3688	6.95501	11.1299	9.60748	10.3486	9.38127	11.2611	9.4411	9.49245	8.36753
BH290	10.3005	7.18529	9.18926	7.34297	11.6944	9.24974	8.67452	8.76398	11.2764	4.19951	8.18097	6.29148
BH203	11.0274	8.89573	9.63157	7.94368	12.1138	9.88099	10.1806	9.84657	11.7585	4.96628	9.19842	7.13106
BH340	9.90287	8.26797	9.79117	6.05069	10.4943	8.92008	8.98894	8.55888	10.5686	7.20776	9.42672	6.43856
BH341	9.58325	8.18643	9.46728	5.47427	10.2407	9.3833	9.51626	8.60332	10.4398	7.52746	9.45001	7.31583
BH314	9.22706	6.15351	8.68772	5.64483	10.5655	8.38144	8.28346	8.14522	10.2267	3.41303	8.08728	6.54362
BH303	10.2785	8.34075	9.96862	7.01411	11.5488	8.55792	9.2027	9.00313	11.1181	4.99852	6.40828	6.10138
BH281	9.15258	6.49446	9.09188	5.79437	10.2281	9.30563	8.238	7.95122	10.1832	5.99884	8.67977	5.8416
BH286	10.2115	7.80964	9.71986	7.06022	11.5344	9.29577	9.95175	8.36911	11.0731	4.97368	8.39761	6.77938
BH307	9.70681	6.87813	9.42752	6.09356	11.0285	9.74727	8.9091	8.83264	10.8488	8.19676	9.13483	7.62475
BH316	9.95589	6.55441	9.33932	6.74532	11.4191	9.43483	8.92458	8.44917	11.0006	4.05741	8.54216	6.15644
BH296	10.3296	7.99682	10.5168	6.65707	12.2969	9.22283	9.35742	8.78916	11.178	8.79606	9.76907	7.5281
BH333	10.2954	7.99762	9.86095	7.05545	11.7087	8.69819	9.29944	8.97731	11.2862	4.25339	9.51506	8.16738
BH317	10.1355	7.65477	10.0016	5.98258	10.234	9.03036	9.73112	9.34387	10.7871	3.08509	8.48986	7.37335
BH331	10.4982	8.15395	9.2249	7.40327	11.9486	9.4516	9.52314	8.86997	11.3882	4.45404	8.57329	6.81181
BH342	10.0372	8.07509	10.1397	6.54274	11.2616	9.69655	9.28351	9.03635	11.1904	3.65804	8.53441	8.70088
BH287	9.58842	7.2408	9.56244	5.7418	10.4626	8.77517	8.77403	8.31252	10.3355	3.54734	8.74403	6.60275
BH305	10.5494	7.50205	9.75128	7.44032	12.0022	9.15049	8.51465	9.21391	11.6803	7.5864	8.48646	8.67922
BH301	9.56251	7.43645	9.45996	6.57412	11.1956	8.6947	8.77949	8.77137	10.7082	5.12785	8.59215	8.16739
BH308	9.80786	6.94302	8.91781	6.23027	11.2542	8.80828	8.42211	9.12919	10.8141	4.29563	8.74912	7.60997
BH310	10.584	7.97314	10.2671	6.82739	11.5174	9.53341	10.0276	8.63018	11.2384	9.30041	9.03824	7.02726
BH330	10.5387	9.06726	10.1761	7.41799	11.9378	9.62841	10.3343	9.62974	11.5157	8.36151	8.58354	7.82612
BH304	10.4692	7.84076	9.64822	7.54644	11.9481	9.5051	8.86204	9.02816	11.3975	4.66574	9.10055	7.3172
BH319	10.4074	7.03006	9.23378	7.32009	11.8465	7.89558	9.01911	8.73026	11.3795	4.31096	9.14853	6.15043
BH300	9.44523	7.27937	9.57179	5.54773	8.98899	9.0279	9.14051	8.33418	10.2335	3.32551	8.28313	5.80999
BH306	10.7245	8.13017	9.78297	7.84423	12.1381	9.16152	8.48971	9.51247	11.6456	5.00131	8.53384	7.34268
BH326	10.2985	7.05985	9.00645	6.09868	10.7182	8.74674	7.82294	8.24696	10.466	5.28627	8.26021	8.06369
BH289	10.5504	7.73145	9.8723	7.47408	12.1007	9.13109	9.34229	8.98671	11.6197	3.84419	8.64888	7.74896
BH285	9.2781	6.61705	9.47762	5.27216	9.92631	7.81687	8.35983	7.75006	10.2555	7.64341	8.14854	5.57317
BH346	10.0878	7.16081	9.29415	6.49917	11.2417	9.48443	8.63456	8.79972	10.9614	6.97923	14.5729	7.05743
BH345	9.21219	6.89137	9.6533	5.2916	9.35684	7.54821	8.28682	8.05177	10.4217	3.26581	9.2654	6.05243
BH299	10.5019	7.72101	9.42016	7.50522	11.9767	9.42296	8.71295	8.94215	11.3333	6.24883	8.7805	8.17907
BH325	10.0055	6.90184	9.06726	6.92021	11.4808	8.94199	9.33945	8.38564	10.8747	3.23622	7.69011	7.11774
BH311	10.0311	7.17073	9.70385	6.1772	11.2477	9.6452	9.7124	8.81528	11.0304	6.88268	8.28524	7.96032
BH309	10.1747	7.3775	9.27591	7.07074	11.7313	9.35011	9.43918	9.09474	11.1729	4.45144	8.70926	6.6299
BH238	8.87368	7.08455	9.5677	6.21035	10.9769	9.02022	9.48146	8.37477	11.0575	5.25936	8.5905	5.31695
BH240	9.59417	8.10087	10.5563	6.12377	12.3111	8.9467	9.96958	9.1306	11.2507	7.51451	10.3541	7.6076
BH271	10.0091	7.97649	9.50729	5.80579	10.7129	9.09137	9.59945	9.10944	10.3828	6.83555	9.62922	8.60522
BH221	10.1872	6.85252	9.80187	5.29883	9.62128	9.07853	8.57834	7.98417	10.5058	4.81167	7.76339	5.10424
BH235	11.0498	8.78362	10.5005	7.79601	12.4013	9.94193	10.3817	9.36075	11.9787	5.00935	10.1957	7.44391
BH241	10.8539	8.71252	10.2519	8.11371	11.0754	9.4927	9.9723	8.99026	11.4868	7.40104	9.53436	9.02607
BH230	9.03911	6.49502	8.90165	4.98773	10.0015	6.94407	8.13676	8.4826	10.0534	3.66678	8.09629	7.52809
BH272	10.4157	7.51463	9.34777	7.46649	11.9586	9.198	8.79073	9.0078	11.4927	3.91238	7.81893	7.62674
BH263	9.78559	7.09357	9.324	6.30885	10.7314	8.8343	8.4528	8.59602	10.8219	13.224	8.19012	7.84886
BH261	11.2851	8.81956	10.0139	7.77946	10.4052	10.0895	10.3119	10.1939	12.0491	5.66358	9.22302	8.34087
BH225	9.66047	7.57708	9.39872	5.38835	10.6358	9.00731	10.2345	8.90454	10.4096	7.97165	9.67326	6.92727
BH256	10.4782	8.49769	10.0669	6.53182	11.9667	10.1087	10.3303	9.3095	11.0391	4.94448	9.65881	8.2571
BH217	10.6509	8.43418	9.95429	7.57268	12.0162	9.65858	10.2746	9.83754	11.4225	5.25122	9.69126	7.71906
BH247	10.3248	9.13671	10.9426	7.19714	11.4601	10.1789	10.0997	10.2427	11.823	5.04001	9.92651	6.98474
BH215	9.78572	7.45302	9.66625	5.77622	10.0704	9.44025	9.23552	8.99005	10.6241	7.06738	9.46858	7.83135
BH211	10.0253	7.5677	9.84481	6.75385	11.1115	8.67352	8.66531	8.94157	10.8461	7.07851	8.21303	6.27681
BH243	9.7613	8.45426	10.2108	7.15243	10.0461	10.0261	10.0481	9.54489	11.5213	9.5144	8.83155	7.37706
BH279	9.38166	7.57209	8.86421	5.09579	10.0659	9.24407	9.36932	8.63029	9.89233	3.46683	9.43318	7.49857
BH266	9.33503	6.59797	9.73026	4.86943	10.6703	7.88589	8.531	5.80969	10.3273	2.82626	8.52259	5.72582
BH264	10.1992	7.51706	9.58735	6.05627	10.6849	9.27518	9.41159	9.34885	11.1545	4.17893	8.9816	6.79939
BH216	10.5146	8.13979	10.2068	7.72853	12.0773	10.3269	10.3735	9.11553	11.6844	5.45616	9.0049	6.48332
BH237	9.60365	8.51915	9.91706	5.39637	7.73147	10.3973	8.64293	9.56883	10.6077	3.4361	9.21954	6.71581
BH259	10.5697	8.0459	10.1101	7.09868	11.9226	9.58353	9.76934	9.11679	11.4708	4.84207	9.85938	8.26033
BH205	10.2021	8.11098	9.87361	6.12242	10.5031	8.98813	9.44031	8.69022	10.7575	4.47528	6.40003	5.58658
BH206	9.80635	7.2476	10.0363	5.85562	10.2578	9.3068	9.18671	8.69829	10.7941	8.79972	10.1206	5.88468
BH258	9.23286	7.03904	8.96024	4.7433	11.4526	8.7437	9.0016	7.98608	9.83524	4.75191	6.24282	5.00953
BH276	9.34773	7.36426	8.62515	4.97144	9.72005	8.94464	8.84661	8.62395	9.49222	5.09891	9.26488	6.99773
BH248	8.88707	7.62914	10.0742	5.71967	12.1042	9.19392	10.0382	8.51377	10.7023	7.44985	9.10461	6.12762
BH228	9.67099	7.80214	9.42598	5.83828	10.7223	9.22728	9.31499	8.89344	10.8745	4.39387	9.37511	6.93965
BH207	9.89404	6.14086	9.06107	6.71136	11.4664	8.85241	8.62599	8.45393	11.25	4.11954	8.52693	6.77671
BH204	10.5108	8.18127	9.8505	7.26211	11.6881	9.45873	9.593	9.46744	11.219	7.30559	9.58224	7.20089
BH253	9.56444	8.38324	9.93668	6.79138	11.3552	9.41035	9.49504	9.62162	11.1285	4.93087	8.9554	7.26513
BH270	11.1032	8.55224	10.2916	7.84716	12.2153	10.2487	9.79699	9.69611	11.9804	6.00881	10.1026	7.04476
BH224	10.3321	7.48626	9.20358	6.91562	11.8528	9.34533	8.75544	9.03706	11.3817	5.45886	8.66524	7.22411
BH227	10.2908	8.54532	9.85841	6.58129	11.1316	9.28894	9.0764	9.28806	10.4131	6.76396	8.74692	6.56789
BH268	10.8161	8.57874	10.7957	6.78898	12.071	9.75001	9.9983	9.20065	11.5428	4.61079	9.73578	7.3231
BH265	10.3303	7.71555	10.5434	6.41152	11.7041	9.34272	9.68719	8.96418	11.1778	7.50856	9.40176	6.6583
BH267	10.5481	8.45929	9.99542	6.70522	12.5607	9.58065	9.84944	9.70663	11.2502	3.87499	11.0554	8.97033
BH212	9.53559	7.24601	9.80061	6.46314	9.2888	8.81329	10.0165	8.49877	10.4817	3.98535	8.9762	7.39196
BH244	9.23193	7.62499	9.85726	6.50041	9.22795	9.45094	9.01295	8.89567	11.0486	5.37897	9.561	5.79574
BH214	8.9275	6.70585	9.00322	4.91885	8.77308	8.75707	9.19094	8.24541	9.83894	6.13753	8.57165	5.96479
BH220	9.94886	8.41377	10.0963	7.63612	12.3129	9.66964	9.19034	9.58447	11.7992	4.57676	8.64971	8.31453
BH210	10.1915	7.8898	9.54731	6.15351	10.6198	9.79282	9.88974	9.50328	10.5469	8.34988	10.0025	6.50876
BH223	11.4219	8.91872	10.2678	8.20645	12.8693	10.5471	10.3941	9.83121	12.3875	5.14953	8.91257	8.44748
BH269	10.911	8.20313	9.63692	7.60567	9.81471	9.8432	9.11227	9.75456	11.6505	4.75014	10.4874	7.87395
BH262	10.258	7.83878	9.27006	5.78684	11.5757	10.1675	9.12827	9.30632	10.945	5.61767	9.02641	7.81509
BH232	9.5861	7.467	9.7443	5.58182	9.8246	8.83165	8.97722	8.58502	10.5977	6.43563	9.60021	5.58482
BH213	9.51274	7.18678	9.13624	5.50385	10.9197	8.9948	9.22889	8.31621	10.5849	6.63135	8.97852	6.2899
BH234	11.0569	8.28466	10.3518	8.0025	12.412	8.47768	9.84671	9.26618	11.9804	8.47212	7.16336	6.76107
BH239	9.93873	8.69326	9.56129	7.30318	12.2268	9.83086	9.91378	9.18377	11.4718	4.47715	9.8619	6.45186
BH245	8.89603	7.77518	9.25145	4.96748	10.4213	8.22177	9.22587	7.67903	9.95836	9.27468	9.5764	7.1291
BH274	10.2758	7.85346	9.15538	7.20006	11.5591	8.95127	9.30899	8.49984	11.1261	3.97902	7.56295	6.56436
BH222	9.94235	8.01449	9.02904	6.08749	10.841	8.60133	9.58368	8.30293	10.4192	3.43378	9.7381	8.95433
BH208	10.0628	7.88496	9.2625	6.6008	11.1875	10.0739	9.02589	9.31036	10.7022	8.15088	10.0112	6.04039
BH273	10.037	8.02621	10.0953	5.70636	10.1349	8.96185	9.49943	9.03538	10.8067	8.53884	10.0204	7.69534
BH249	10.0988	8.36119	11.0128	6.83059	10.9296	9.06827	9.71587	9.35194	11.6717	9.91953	9.55476	6.76792
BH255	9.20971	7.32914	9.0415	6.66041	10.6844	9.00259	7.74236	8.7476	10.7268	3.43336	8.82849	6.74712
BH229	10.7497	8.0815	9.57297	7.73782	12.3266	9.57768	9.80471	9.35023	11.8049	5.03169	10.2533	6.88226
BH254	10.0264	8.41122	9.94969	7.62345	10.8622	9.77849	10.1557	9.13424	11.7334	5.55238	9.91169	6.84684
BH242	10.3361	8.22086	9.63726	7.41425	11.6407	9.39132	9.52685	9.44503	11.9913	7.94746	9.28745	7.34346
BH246	9.36462	8.54399	9.46866	6.48609	11.4114	9.62546	9.77078	9.5309	10.7602	6.60448	9.59382	6.58737
BH231	10.3495	8.30753	9.69977	7.02932	11.5297	9.23924	10.0416	8.73191	11.2081	4.46688	9.62175	7.554
BH260	9.4502	7.11418	8.3641	5.55366	10.0456	8.91933	8.63511	8.42715	10.1747	6.00501	8.4766	5.8514
BH218	10.2998	7.40435	9.38115	7.32312	11.7624	9.90422	8.75518	9.13787	11.3824	6.09564	8.83735	7.96007
BH236	9.24812	6.88497	9.09702	5.30446	10.2349	9.14829	8.85001	8.28592	10.2497	3.25304	8.05469	6.56567
BH277	11.19	7.58281	9.80749	8.46329	12.5919	9.45914	8.49716	9.31879	12.1193	13.7336	9.3992	7.40617
BH280	9.46336	6.91075	8.73496	5.94342	10.4046	9.59414	6.95604	7.85591	10.8709	4.38494	8.48377	6.12133
BH302	9.69708	7.30903	8.9895	4.38888	9.24618	8.82161	8.05581	9.11203	9.56621	7.31293	10.3251	6.96264
BH318	10.0544	6.72666	9.79376	6.53749	11.2644	7.11655	8.70068	9.34568	10.9069	6.01925	8.89585	6.94047
BH323	9.66439	5.87901	9.28289	6.12841	11.0855	8.66565	8.72529	8.08674	10.8687	4.54086	8.56955	8.05403
BH334	10.9984	9.1258	10.6412	7.15434	11.3333	9.55482	10.5513	8.98573	11.5993	9.28572	10.0159	7.15194
BH336	10.0212	7.06438	7.93536	3.6243	8.48136	8.38855	6.09032	8.25134	9.19073	2.54508	8.77466	5.27355
BH348	10.9531	7.38384	9.78397	7.36592	12.0773	9.29613	9.09541	9.12762	11.7721	3.37853	7.31111	6.69112
BH349	10.6757	6.79831	9.6617	7.18779	11.8644	8.812	8.36703	8.23521	11.6782	4.22286	14.9955	8.15898
