# Supplementary material for: The fecal microbiota of Thai school-aged children associated with demographic factors and diet
Source: PeerJ. 2022 Apr 20;10:e13325. doi: 10.7717/peerj.13325 (PMC9034706; doi:10.7717/peerj.13325)
Supplement: File S6 [file peerj-10-13325-s005.xlsx]

## Sheet: MFA_Diets
The analysis was performed on 125 individuals, described by 17 variables								Description
								HEB - Healthy Eating
Eigenvalues								HSFB - High Sugar Foods and Beverages
								HSF - High Salt Foods
	eigenvalue	variance.percent	cumulative.variance.percent					FV - Fruits and Vegetables
Dim.1	3.28374	27.3655	27.3655					HFF - High Fat Foods
Dim.2	1.01692	8.47467	35.8402
Dim.3	0.841342	7.01144	42.8516
Dim.4	0.718949	5.99147	48.8431
Dim.5	0.670697	5.58935	54.4324
The contribution of variables to the dimensions
	Dim.1	Dim.2	Dim.3	Dim.4	Dim.5
Diet	3.51304	97.7557	89.4606	93.0193	95.9418
Total_bacteria	24.3161	0.127555	0.00458669	0.0261163	0.398146
Phylum	20.6544	0.233079	4.75614	0.853742	0.690048
Class	24.7099	0.0841606	0.540838	0.757092	0.0928931
Genus	26.8065	1.79952	5.23779	5.34374	2.8771
The corrrelation of variables with the dimensions
	Dim.1	Dim.2	Dim.3	Dim.4	Dim.5
Diet	0.410236	0.997301	0.955112	0.975124	0.989384
Total_bacteria	0.893576	0.0360158	0.00621206	0.0137027	0.0516755
Phylum	0.823629	0.0989465	0.201866	0.155569	0.129333
Class	0.900782	0.0292549	0.0674559	0.0737774	0.0249606
Genus	0.941681	0.20526	0.399878	0.34397	0.227237
List of variables characterizing the dimensions of the analysis.
A F-test was used to assess whether the variable had a significant influence on the dimension .
A T-test was done to see whether the coordinates of the individuals in one category are significantly different from others.
$Dim.1				$Dim.2				$Dim.3				$Dim.4
$quanti				$quali				$quanti				$quanti
	correlation	p.value			R2	p.value			correlation	p.value			correlation	p.value
Bacteroides	0.914603	3.35547e-50		HFF	0.452452	8.96451e-16		Roseburia	-0.179446	0.0452421		Bifidobacterium	-0.180511	0.043959
Gamma_proteobacteria	0.900782	2.21441e-46		HSFB	0.391985	4.72962e-13		Firmicutes	-0.205196	0.0216992		Akkermansia	-0.262936	0.00305164
Total_bacteria	0.893576	1.31819e-44		HSF	0.363328	1.09356e-12		Ruminococcus	-0.20816	0.0198329
Firmicutes	0.751292	6.01304e-24		FV	0.357787	1.85526e-12						$quali
Faecalibacterium	0.749651	8.52432e-24		HEB	0.274544	3.14249e-09		$quali					R2	p.value
Bacteroidetes	0.72797	6.73605e-22							R2	p.value		HSFB	0.36065	9.50295e-12
Prevotella	0.703063	6.23952e-20		$category				HSFB	0.503386	2.56778e-18		HFF	0.352219	2.07568e-11
Ruminococcus	0.644019	5.41288e-16			Estimate	p.value		HFF	0.372074	3.24065e-12		HSF	0.214718	3.94964e-07
Roseburia	0.631993	2.70803e-15		FV=FV_Moderate_to_High_Risk	1.25626	2.0316e-10		FV	0.26979	4.68063e-09		HEB	0.181437	4.9681e-06
Lactobacillus	0.524312	3.48439e-10		HEB=HEB_Moderate_to_High_Risk	1.26404	3.12784e-09		HEB	0.199588	1.26507e-06		FV	0.128866	0.000221405
Bifidobacterium	0.276201	0.00182159		HFF=HFF_Low_to_Moderate_Risk	0.32716	4.97317e-09		HSF	0.048368	0.0485973
Akkermansia	0.185318	0.0385399		HSFB=HSFB_Low_Risk	1.67042	8.29918e-07						$category
				HSF=HSF_Low_Risk	0.817724	2.11894e-06		$category					Estimate	p.value
$quali				HSFB=HSFB_Low_to_Moderate_Risk	0.0893277	7.40218e-06			Estimate	p.value		HSFB=HSFB_Moderate_to_High_Risk	0.467036	1.82713e-10
	R2	p.value		HFF=HFF_Low_Risk	1.65766	2.6941e-05		HSFB=HSFB_High_Risk	0.845683	1.72822e-11		HSF=HSF_Moderate_to_High_Risk	0.513407	9.96714e-07
HFF	0.10245	0.00436009		HFF=HFF_High_Risk	-1.22647	0.000384252		HFF=HFF_Low_Risk	1.83524	2.07496e-09		FV=FV_Low_to_Moderate_Risk	0.375726	6.16473e-05
FV	0.0733999	0.00955946		HEB=HEB_Low_to_Moderate_Risk	-0.806571	0.000273176		HEB=HEB_Moderate_to_High_Risk	1.05184	3.48594e-07		HFF=HFF_Low_Risk	1.45859	7.14434e-05
				FV=FV_Low_Risk	-0.951677	1.29011e-05		FV=FV_Low_Risk	0.374155	7.05053e-07		HEB=HEB_Low_to_Moderate_Risk	0.133671	0.000505635
$category				HFF=HFF_Moderate_to_High_Risk	-0.758354	6.17641e-06		HFF=HFF_High_Risk	0.0210045	0.000904388		HFF=HFF_Moderate_to_High_Risk	0.00123931	0.0272283
	Estimate	p.value		HSFB=HSFB_Moderate_to_High_Risk	-0.890465	8.91717e-07		HSFB=HSFB_Low_Risk	0.63403	0.00731304		HSFB=HSFB_High_Risk	-0.660993	0.000751365
FV=FV_Low_Risk	0.829418	0.00388118		HSF=HSF_Moderate_to_High_Risk	-0.967585	6.87139e-11		FV=FV_Moderate_to_High_Risk	0.267815	0.0230814		FV=FV_Low_Risk	-0.308709	0.000235574
HFF=HFF_Low_Risk	1.43173	0.017015						HEB=HEB_Low_Risk	-0.61846	0.0493717		HSFB=HSFB_Low_to_Moderate_Risk	-0.475256	2.77376e-06
HFF=HFF_High_Risk	0.33713	0.0188583						HSF=HSF_Low_Risk	-0.318342	0.0138603		HSF=HSF_Low_to_Moderate_Risk	-0.461686	2.60681e-06
HFF=HFF_Moderate_to_High_Risk	-1.04751	0.0248107						HFF=HFF_Low_to_Moderate_Risk	-1.03299	0.00449169		HEB=HEB_Low_Risk	-0.582734	1.45781e-06
								FV=FV_Low_to_Moderate_Risk	-0.641969	5.90323e-10		HFF=HFF_High_Risk	-1.30049	4.1592e-09
								HSFB=HSFB_Low_to_Moderate_Risk	-1.08216	1.30682e-10
