# Supplementary material for: The fecal microbiota of Thai school-aged children associated with demographic factors and diet
Source: PeerJ. 2022 Apr 20;10:e13325. doi: 10.7717/peerj.13325 (PMC9034706; doi:10.7717/peerj.13325)
Supplement: File S7 [file peerj-10-13325-s006.xlsx]

## Sheet: MFA_Demographic fact
The analysis was performed on 126 individuals, described by 18 variables
									Age_tertile
Eigenvalues									age_A: ≤ 8.05 y/o
									age_B: 8.05 < x < 11.06 y/o
	eigenvalue	variance.percent	cumulative.variance.percent						age_C: ≥ 11.06 y/o
Dim.1	3.44151	18.5995	18.5995
Dim.2	1.53187	8.27894	26.8784
Dim.3	1.45887	7.88442	34.7629						BMI-for-age cutoff (according to WHO)
Dim.4	1.35089	7.30082	42.0637						Severe thinness: < -3 SD
Dim.5	1.22569	6.62418	48.6878						Thinness: ≥ -3 SD to < -2 SD
									Normal: ≥ -2 SD to + ≤ +1.0 SD
The contribution of variables to the dimensions									Overweight: > +1SD to ≤ +2SD (equivalent to BMI 25 kg/m2 at 19 years)
									Obese: > +2SD (equivalent to BMI 30 kg/m2 at 19 years)
	Dim.1	Dim.2	Dim.3	Dim.4	Dim.5
BMI_z-score	5.03578	22.449	14.7072	20.107	31.1963
Age	2.32489	20.1454	30.9932	2.43731	6.56305
Gender	0.405397	0.0967542	1.5438	18.8256	7.42666
Ethnicity	3.26654	16.584	26.6711	33.3144	9.64446
Birth_record	0.31898	24.4519	0.752298	5.28099	8.5373
Feeding_type	1.11982	11.5665	18.9717	10.9011	22.2599
Total_bacteria	20.7408	2.5298	1.16468	0.843392	2.94087
Phylum	19.2773	0.320281	0.651475	5.6248	4.28255
Class	22.6401	0.31971	2.9445	0.280931	2.23168
Genus	24.8704	1.53665	1.59999	2.38442	4.91723
The corrrelation of variables with the dimensions
	Dim.1	Dim.2	Dim.3	Dim.4	Dim.5
BMI_z-score	0.416301	0.586421	0.463206	0.521175	0.61836
Age	0.282863	0.55552	0.672422	0.181453	0.283624
Gender	0.118118	0.0384987	0.150074	0.504295	0.301708
Ethnicity	0.335288	0.50403	0.623777	0.67085	0.343818
Birth_record	0.104775	0.612022	0.104762	0.267096	0.323482
Feeding_type	0.196313	0.420932	0.526092	0.383748	0.522337
Total_bacteria	0.844864	0.196858	0.13035	0.106739	0.189858
Phylum	0.815021	0.0912071	0.115311	0.278875	0.229381
Class	0.882702	0.0699825	0.20726	0.0616041	0.165388
Genus	0.928779	0.231215	0.159894	0.263624	0.470308
List of variables characterizing the dimensions of the analysis.
A F-test was used to assess whether the variable had a significant influence on the dimension .
A T-test was done to see whether the coordinates of the individuals in one category are significantly different from others.
$Dim.1				$quanti					$Dim.3					$Dim.4					$Dim.5
$quanti					correlation	p.value			$quanti					$quanti					$quanti
	correlation	p.value		Lactobacillus	0.259934	0.00328879				correlation	p.value				correlation	p.value				correlation	p.value
Bacteroides	0.903445	1.92814e-47		Total_bacteria	0.196858	0.0271486			Gamma_proteobacteria	0.20726	0.019878			Firmicutes	0.286891	0.00112599			Ruminococcus	0.287796	0.00108415
Gamma_proteobacteria	0.882702	1.73779e-42												Roseburia	0.224754	0.0114007			Firmicutes	0.216995	0.0146611
Total_bacteria	0.844864	1.73822e-35		$quali					$quali					Bacteroidetes	0.200838	0.024136			Bacteroidetes	0.193997	0.0295083
Firmicutes	0.760752	4.92585e-25			R2	p.value				R2	p.value								Total_bacteria	-0.189858	0.0332283
Faecalibacterium	0.728912	3.83254e-22		Birth_records	0.374571	2.66095e-14			Age_tertile	0.452152	8.46467e-17			$quali					Prevotella	-0.236721	0.00761339
Bacteroidetes	0.701465	5.82927e-20		BMI_z-score	0.34389	3.61501e-11			Ethnicity	0.389098	2.76168e-12				R2	p.value
Prevotella	0.695362	1.64988e-19		Age_tertile	0.308602	1.39082e-10			Feeding_type	0.276773	2.21505e-09			Ethnicity	0.45004	5.50424e-15			$quali
Ruminococcus	0.647988	2.37593e-16		Ethnicity	0.254046	3.25922e-07			BMI_z-score	0.21456	1.68943e-06			Gender	0.254314	1.74008e-09				R2	p.value
Roseburia	0.623144	6.59944e-15		Feeding_type	0.177184	6.18179e-06								BMI_z-score	0.271623	1.89492e-08			BMI_z-score	0.38237	9.52837e-13
Lactobacillus	0.51563	6.46737e-10							$category					Feeding_type	0.147262	5.56093e-05			Feeding_type	0.272836	3.093e-09
Bifidobacterium	0.272184	0.00204762		$category						Estimate	p.value			Birth_records	0.0713403	0.00249959			Birth_records	0.104641	0.000220113
Akkermansia	0.212324	0.0169931			Estimate	p.value			Age_tertile=age_B	1.00274	5.21143e-15								Gender	0.0910276	0.000596336
				Birth_records=Cesarean_section	0.808384	2.66095e-14			BMI_z-score=Thinness	2.03538	2.45614e-07			$category					Ethnicity	0.118211	0.00403474
$quali				BMI_z-score=OB	1.28638	9.15801e-11			Ethnicity=Thai	1.57801	7.54848e-07				Estimate	p.value			Age_tertile	0.0804425	0.00575574
	R2	p.value		Age_tertile=age_A	1.05679	1.35486e-10			Ethnicity=Lahu	-2.45129	2.12907e-08			Gender=Male	0.592205	1.74008e-09
BMI_z-score	0.173307	3.47558e-05		Ethnicity=Chinese	0.806912	3.48527e-06			Feeding_type=Mixed_feeding	-1.68831	6.32999e-10			Ethnicity=Thai	0.849289	9.45379e-09			$category
Ethnicity	0.112418	0.00573818		Feeding_type=Formula_feeding	0.441236	9.11951e-05			Age_tertile=age_C	-0.91861	6.60679e-12			Ethnicity=Lahu	1.58882	2.98418e-05				Estimate	p.value
Age_tertile	0.0800114	0.00592407		Feeding_type=Mixed_feeding	0.375211	0.0224688								BMI_z-score=Thinness	1.68771	5.08046e-05			BMI_z-score=OV	1.16035	5.32405e-12
				Ethnicity=Thai	0.552296	0.0325804								Birth_records=Cesarean section	0.331296	0.00249959			Birth_records=Cesarean section	0.38219	0.000220113
$category				Ethnicity=Thai-Yai	-0.559703	0.00484726								Feeding_type=Breastfeeding	0.274028	0.00430176			Ethnicity=Chinese	0.638743	0.000223508
	Estimate	p.value		Ethnicity=Akha	-0.547558	0.00113026								Age_tertile=age_A	-0.325787	0.0425318			Gender=Female	0.337485	0.000596336
BMI_z-score=Normal	1.19285	0.000766496		Age_tertile=age_C	-0.764828	0.000140075								Birth_records=Vaginal delivery	-0.331296	0.00249959			Feeding_type=Breastfeeding	0.189613	0.00230684
Age_tertile=age_C	0.674488	0.00341771		Feeding_type=Breastfeeding	-0.816447	9.30869e-07								Ethnicity=Akha	-0.973774	0.0017504			Feeding_type=Mixed feeding	1.02167	0.00488328
Feeding_type=Mixed_feeding	0.965581	0.0295952		BMI_z-score=Normal	-0.773706	8.32776e-09								Ethnicity=Chinese	-1.07683	0.000424045			Ethnicity=Thai-Yai	-0.375482	0.015644
Ethnicity=Akha	0.625102	0.0445228		Birth_records=Vaginal delivery	-0.808384	2.66095e-14								Feeding_type=Formula feeding	-0.893119	1.41892e-05			BMI_z-score=Normal	-0.497907	0.00200102
Age_tertile=age_B	-0.596113	0.00623498												BMI_z-score=OV	-1.41707	2.33171e-06			Age_tertile=age_A	-0.47557	0.00131654
BMI_z-score=Thinness	-1.61794	0.00274259												Gender=Female	-0.592205	1.74008e-09			BMI_z-score=OB	-1.0706	0.000933946
BMI_z-score=OB	-0.544433	0.000786507																	Gender=Male	-0.337485	0.000596336
Ethnicity=Thai	-1.29365	0.000249314																	Birth_records=Vaginal delivery	-0.38219	0.000220113
																			Feeding_type=Formula feeding	-1.21128	8.16911e-09
