# Supplementary material for: The fecal microbiota of Thai school-aged children associated with demographic factors and diet
Source: PeerJ. 2022 Apr 20;10:e13325. doi: 10.7717/peerj.13325 (PMC9034706; doi:10.7717/peerj.13325)
Supplement: File S8 [file peerj-10-13325-s007.xlsx]

## Sheet: Sheet1
Subject_ID	Age	Birth_records	Feeding_type
BH332	6.05	Caesarean section	Breastfeeding
BH348	6.07	Caesarean section	Formular feeding
BH347	6.08	Caesarean section	Breastfeeding
BH282	6.08	Caesarean section	Mixed feeding
BH321	6.11	Caesarean section	Breastfeeding
BH334	6.11	Caesarean section	Breastfeeding
BH336	7	Caesarean section	Breastfeeding
BH323	7.01	Caesarean section	Breastfeeding
BH328	7.02	Caesarean section	Mixed feeding
BH327	7.02	Caesarean section	Mixed feeding
BH341	7.09	Caesarean section	Breastfeeding
BH317	7.09	Caesarean section	Breastfeeding
BH301	7.1	Caesarean section	Formular feeding
BH312	8.03	Caesarean section	Formular feeding
BH314	8.04	Caesarean section	Formular feeding
BH330	8.08	Caesarean section	Breastfeeding
BH284	8.09	Caesarean section	Formular feeding
BH325	8.1	Caesarean section	Formular feeding
BH300	9.02	Caesarean section	Breastfeeding
BH271	9.06	Caesarean section	Formular feeding
BH221	9.06	Caesarean section	Breastfeeding
BH217	9.08	Caesarean section	Breastfeeding
BH302	9.11	Caesarean section	Breastfeeding
BH279	10.01	Caesarean section	Breastfeeding
BH215	10.03	Caesarean section	Breastfeeding
BH270	10.05	Caesarean section	Breastfeeding
BH214	10.06	Caesarean section	Breastfeeding
BH253	10.07	Caesarean section	Breastfeeding
BH248	10.08	Caesarean section	Breastfeeding
BH241	10.09	Caesarean section	Mixed feeding
BH276	10.1	Caesarean section	Breastfeeding
BH212	11.02	Caesarean section	Breastfeeding
BH237	11.04	Caesarean section	Breastfeeding
BH247	11.06	Caesarean section	Breastfeeding
BH273	11.06	Caesarean section	Breastfeeding
BH249	11.11	Caesarean section	Breastfeeding
BH242	12.02	Caesarean section	Breastfeeding
BH202	12.03	Caesarean section	Breastfeeding
BH259	13.01	Caesarean section	Mixed feeding
BH311	13.07	Caesarean section	Breastfeeding
BH281	14.05	Caesarean section	Breastfeeding
BH220	15.05	Caesarean section	Breastfeeding
BH318	6.06	Vaginal delivery	Breastfeeding
BH337	6.08	Vaginal delivery	Breastfeeding
BH294	6.1	Vaginal delivery	Breastfeeding
BH344	7	Vaginal delivery	Formular feeding
BH293	7.01	Vaginal delivery	Breastfeeding
BH295	7.01	Vaginal delivery	Breastfeeding
BH291	7.02	Vaginal delivery	Formular feeding
BH343	7.02	Vaginal delivery	Breastfeeding
BH298	7.03	Vaginal delivery	Breastfeeding
BH305	7.05	Vaginal delivery	Formular feeding
BH288	7.07	Vaginal delivery	Breastfeeding
BH331	7.09	Vaginal delivery	Breastfeeding
BH342	8.01	Vaginal delivery	Breastfeeding
BH316	8.03	Vaginal delivery	Formular feeding
BH333	8.03	Vaginal delivery	Breastfeeding
BH320	8.04	Vaginal delivery	Breastfeeding
BH307	8.04	Vaginal delivery	Breastfeeding
BH340	8.06	Vaginal delivery	Breastfeeding
BH287	8.07	Vaginal delivery	Breastfeeding
BH304	8.07	Vaginal delivery	Breastfeeding
BH286	8.08	Vaginal delivery	Formular feeding
BH308	8.09	Vaginal delivery	Breastfeeding
BH345	8.09	Vaginal delivery	Formular feeding
BH290	8.1	Vaginal delivery	Formular feeding
BH310	8.1	Vaginal delivery	Breastfeeding
BH299	8.11	Vaginal delivery	Breastfeeding
BH346	9	Vaginal delivery	Formular feeding
BH349	9	Vaginal delivery	Breastfeeding
BH306	9.02	Vaginal delivery	Breastfeeding
BH289	9.02	Vaginal delivery	Breastfeeding
BH326	9.03	Vaginal delivery	Breastfeeding
BH285	9.1	Vaginal delivery	Formular feeding
BH235	9.1	Vaginal delivery	Breastfeeding
BH243	9.11	Vaginal delivery	Breastfeeding
BH261	10	Vaginal delivery	Breastfeeding
BH230	10.01	Vaginal delivery	Breastfeeding
BH263	10.01	Vaginal delivery	Breastfeeding
BH225	10.01	Vaginal delivery	Breastfeeding
BH256	10.01	Vaginal delivery	Breastfeeding
BH272	10.02	Vaginal delivery	Breastfeeding
BH238	10.04	Vaginal delivery	Breastfeeding
BH211	10.04	Vaginal delivery	Breastfeeding
BH277	10.05	Vaginal delivery	Breastfeeding
BH309	10.06	Vaginal delivery	Formular feeding
BH319	10.07	Vaginal delivery	Breastfeeding
BH236	10.07	Vaginal delivery	Breastfeeding
BH206	10.1	Vaginal delivery	Breastfeeding
BH240	10.11	Vaginal delivery	Breastfeeding
BH216	10.11	Vaginal delivery	Breastfeeding
BH205	10.11	Vaginal delivery	Breastfeeding
BH207	10.11	Vaginal delivery	Breastfeeding
BH267	10.11	Vaginal delivery	Breastfeeding
BH224	11	Vaginal delivery	Breastfeeding
BH228	11.01	Vaginal delivery	Breastfeeding
BH258	11.03	Vaginal delivery	Breastfeeding
BH265	11.03	Vaginal delivery	Breastfeeding
BH227	11.04	Vaginal delivery	Breastfeeding
BH244	11.04	Vaginal delivery	Breastfeeding
BH213	11.04	Vaginal delivery	Breastfeeding
BH280	11.04	Vaginal delivery	Breastfeeding
BH264	11.06	Vaginal delivery	Breastfeeding
BH223	11.07	Vaginal delivery	Breastfeeding
BH266	11.1	Vaginal delivery	Formular feeding
BH218	11.1	Vaginal delivery	Breastfeeding
BH204	11.11	Vaginal delivery	Breastfeeding
BH203	12	Vaginal delivery	Breastfeeding
BH260	12.01	Vaginal delivery	Breastfeeding
BH210	12.02	Vaginal delivery	Breastfeeding
BH234	12.03	Vaginal delivery	Formular feeding
BH231	12.03	Vaginal delivery	Formular feeding
BH254	12.05	Vaginal delivery	Mixed feeding
BH246	12.05	Vaginal delivery	Breastfeeding
BH255	12.07	Vaginal delivery	Breastfeeding
BH222	12.08	Vaginal delivery	Breastfeeding
BH229	12.09	Vaginal delivery	Breastfeeding
BH274	12.11	Vaginal delivery	Mixed feeding
BH208	13	Vaginal delivery	Breastfeeding
BH262	13.07	Vaginal delivery	Mixed feeding
BH232	13.08	Vaginal delivery	Breastfeeding
BH296	13.1	Vaginal delivery	Breastfeeding
BH268	13.11	Vaginal delivery	Mixed feeding
BH269	14.09	Vaginal delivery	Breastfeeding
BH245	14.09	Vaginal delivery	Breastfeeding
BH303	14.1	Vaginal delivery	Breastfeeding
BH239	15.1	Vaginal delivery	Breastfeeding
